# Supplementary material for: Adolescent health in rural Ghana: A cross-sectional study on the co-occurrence of infectious diseases, malnutrition and cardio-metabolic risk factors
Source: PubMed Central journal article supplement (PMC5519039; doi:10.1371/journal.pone.0180436), 2017-07-20
Supplement: pone.0180436.s001.pdf [file pone.0180436.s001.pdf]

**Adolescent health in Agogo, rural Ghana**

German Institute of Human Nutrition Potsdam – School of Medical Sciences Kumasi

Informed Consent :  yes  no (if no, do not proceed)

Study ID

Name: \_\_\_\_\_ Date: \_\_\_\_\_

Detailed \_\_\_\_\_

Address: \_\_\_\_\_

.....cut here.....cut here.....cut here.....cut here.....cut here.....cut here.....cut here.....cut here.....

**Medical History**

Study ID

Age: ..... (years)

Birth date: \_ \_ \_ \_ \_

Sex:  male  female

Residence:  Agogo  
 other:.....

Ethnic group:  Akan  
 other: .....

Diabetes:  none or not known  
 known since: .....  
Treatment:  none  
 current antidiabetic drug(s):.....  
.....  
 other:.....

Hypertension:  none or not known  
 known since: .....  
Treatment:  none  
 current anti-hypertension drug(s) .....  
.....  
 other:.....

Diabetes known among parents, siblings, children:  no  yes: .....  
known among other relatives:  no  yes: .....

Hypertension known among parents, siblings, children:  no  yes: .....  
known among other relatives:  no  yes: .....

Did you have fever in the last 2 days?  no  yes



## Laboratory Results

Study ID

Fasting glucose:  mmol/L

Hemoglobin (Hb):  g/dL

### Malaria rapid test (MRT), results:

pan-Lactatdehydrogenase (pLDH)  negative

positive

HRP2  negative

positive

Malaria microscopy, results:  malaria parasite count (MPS) per 200 white blood cells (WBC)

Plasmodium species:  *P. falciparum*

*P. ovale*

*P. malariae*

*P. vivax*

unknown

**Socioeconomic status**

Study ID

- Boarding school in:**  Kumasi  
 Accra  
 Tamale  
 other.....

- Literacy:**  able to read well  
 able to read with difficulty  
 unable to read

- Education mother:**  
 none  
 primary  
 secondary  
 tertiary  
 other: .....

- Education father:**  
 none  
 primary  
 secondary  
 tertiary  
 other: .....

- Occupation mother:**  
 subsistence farmer  
 commercial farmer  
 casual labourer  
 artisan  
 trader  
 businesswoman  
 public servant  
 unemployed  
 other:.....

- Occupation father:**  
 subsistence farmer  
 commercial farmer  
 casual labourer  
 artisan  
 trader  
 businessman  
 public servant  
 unemployed  
 other:.....

**Household:** No. of people living in household:.....

No. of siblings:.....

Did you sleep under a bednet last night?  no  yes

| <b>Household's physical assets:</b> | <b>Yes</b>               | <b>No</b>                |
|-------------------------------------|--------------------------|--------------------------|
| Electricity                         | <input type="checkbox"/> | <input type="checkbox"/> |
| Pipe-borne water                    | <input type="checkbox"/> | <input type="checkbox"/> |
| Radio                               | <input type="checkbox"/> | <input type="checkbox"/> |
| Fan                                 | <input type="checkbox"/> | <input type="checkbox"/> |
| Cupboard                            | <input type="checkbox"/> | <input type="checkbox"/> |
| Television                          | <input type="checkbox"/> | <input type="checkbox"/> |
| Bicycle                             | <input type="checkbox"/> | <input type="checkbox"/> |
| Motor-bike                          | <input type="checkbox"/> | <input type="checkbox"/> |
| Fridge                              | <input type="checkbox"/> | <input type="checkbox"/> |
| Car/truck/tractor                   | <input type="checkbox"/> | <input type="checkbox"/> |
| Cattle                              | <input type="checkbox"/> | <input type="checkbox"/> |

## Physical Examination

Study ID

Temp:  (ax., °C)

|           | Systolic BP (mmHg):  | Diastolic BP (mmHg): | Heart rate (/min):   |
|-----------|----------------------|----------------------|----------------------|
| 0 minutes | <input type="text"/> | <input type="text"/> | <input type="text"/> |
| 3 minutes | <input type="text"/> | <input type="text"/> | <input type="text"/> |
| 6 minutes | <input type="text"/> | <input type="text"/> | <input type="text"/> |

Weight:  (kg)

Height:  (cm)

Waist circumference:  (cm)

Hip circumference:  (cm)

Mid-upper arm circumference:  (cm)
